# Supplementary material for: Integrated Analysis of Diffrentially Expressed Genes and Epigenetics Biomarkers in HCV-cirrhosis
Source: Research Square preprint supplement (doi:10.21203/rs.3.rs-626585/v1), 2021-06-23
Supplement: Supplementary file 1 [file 0d57f98846e2d74c2d23ec47.docx]

**Supplementary table 2** The methylation change of 14 hub genes

| **Probes** | **gene** | **feature** | **Cgi** | **logFC** | **deltaBeta** | **P.Value** | **adj.P.Val** |
| --- | --- | --- | --- | --- | --- | --- | --- |
| cg25668626 | OAS1 | TSS1500 | Opensea | -0.160369618 | 0.160369618 | 1.49E-11 | 3.90E-10 |
| cg12560128 | OAS2 | TSS1500 | Opensea | 0.135783026 | -0.135783026 | 1.53E-08 | 1.73E-07 |
| cg20870559 | OAS2 | 1stExon | Opensea | 0.156241227 | -0.156241227 | 1.53E-09 | 2.24E-08 |
| cg19371652 | OAS2 | TSS1500 | Opensea | 0.186480264 | -0.186480264 | 1.90E-12 | 6.72E-11 |
| cg16399664 | OAS2 | Body | Opensea | 0.198174949 | -0.198174949 | 4.67E-11 | 1.05E-09 |
| cg21549285 | MX1 | 5'UTR | Shore | 0.16124875 | -0.16124875 | 3.32E-08 | 3.45E-07 |
| cg20062691 | ISG15 | Body | Island | 0.125813028 | -0.125813028 | 2.57E-07 | 2.16E-06 |
| cg05552874 | IFIT1 | Body | Opensea | -0.160167804 | 0.160167804 | 9.00E-08 | 8.42E-07 |
| cg12461141 | TRIM22 | TSS1500 | Opensea | 0.123041898 | -0.123041898 | 4.66E-11 | 1.05E-09 |
| cg21130374 | MX2 | 5'UTR | Opensea | 0.120012031 | -0.120012031 | 1.46E-05 | 8.18E-05 |
| cg02949186 | MX2 | TSS200 | Opensea | 0.171046559 | -0.171046559 | 7.14E-11 | 1.52E-09 |
| cg21390801 | MX2 | TSS1500 | Opensea | 0.195817866 | -0.195817866 | 5.64E-12 | 1.70E-10 |
| cg06752054 | MX2 | TSS1500 | Opensea | 0.255448166 | -0.255448166 | 2.22E-15 | 2.62E-13 |
| cg15281283 | MX2 | TSS200 | Opensea | 0.293298612 | -0.293298612 | 3.25E-19 | 3.08E-16 |
| cg05656374 | MX2 | TSS200 | Opensea | 0.296830711 | -0.296830711 | 3.14E-20 | 6.30E-17 |
| cg08946713 | STAT1 | Body | Opensea | 0.102967692 | -0.102967692 | 8.52E-08 | 8.03E-07 |
| cg00676801 | STAT1 | 5'UTR | Shore | 0.268093292 | -0.268093292 | 1.33E-19 | 1.64E-16 |
| cg14951497 | STAT1 | 5'UTR | Shelf | 0.287402102 | -0.287402102 | 1.19E-22 | 1.89E-18 |
| cg03607951 | IFI44L | TSS1500 | Opensea | -0.106849734 | 0.106849734 | 2.34E-05 | 0.000125323 |
| cg27315157 | IFI44L | 5'UTR | Opensea | 0.295281613 | -0.295281613 | 1.68E-14 | 1.34E-12 |
| cg16363586 | BST2 | 1stExon | Opensea | 0.101263738 | -0.101263738 | 0.003049877 | 0.009904627 |
| cg12090003 | BST2 | 1stExon | Opensea | 0.107850742 | -0.107850742 | 0.000453111 | 0.001803931 |
| cg01254505 | BST2 | TSS200 | Opensea | 0.126963093 | -0.126963093 | 3.18E-06 | 2.08E-05 |
| cg11558551 | BST2 | TSS200 | Opensea | 0.151838017 | -0.151838017 | 1.33E-05 | 7.53E-05 |
| cg23893332 | IFI27 | TSS1500 | Opensea | -0.17120072 | 0.17120072 | 4.52E-10 | 7.64E-09 |
| cg20161089 | IFI27 | 5'UTR | Opensea | 0.103597454 | -0.103597454 | 7.74E-05 | 0.000368672 |
| cg03447547 | IFI27 | TSS200 | Opensea | 0.121613379 | -0.121613379 | 2.01E-10 | 3.76E-09 |
| cg16341979 | IFI27 | TSS200 | Opensea | 0.135386427 | -0.135386427 | 1.43E-07 | 1.28E-06 |
| cg10778971 | IFI27 | 5'UTR | Opensea | 0.139585906 | -0.139585906 | 3.18E-11 | 7.51E-10 |
| cg05883128 | DDX60 | 5'UTR | Shore | 0.124618433 | -0.124618433 | 1.99E-10 | 3.73E-09 |
| cg17459635 | ISG20 | TSS1500 | Opensea | -0.10488761 | 0.10488761 | 1.19E-11 | 3.22E-10 |
| cg19009305 | ISG20 | TSS1500 | Opensea | 0.118433487 | -0.118433487 | 3.45E-13 | 1.60E-11 |
| cg07069934 | ISG20 | Body | Opensea | 0.190426253 | -0.190426253 | 2.21E-11 | 5.49E-10 |
| cg07463059 | IFI16 | 5'UTR | Opensea | 0.103802479 | -0.103802479 | 1.14E-09 | 1.73E-08 |
| cg01342196 | IFI16 | TSS200 | Opensea | 0.267801323 | -0.267801323 | 3.93E-15 | 4.15E-13 |
| cg20597486 | IFI16 | 5'UTR | Opensea | 0.288062995 | -0.288062995 | 1.98E-17 | 6.69E-15 |
